# Supplementary material for: Clinical risk associated with COVID-19 among 86000 patients with congenital heart disease
Source: HighWire-hosted journal article supplement (doi:10.1136/openhrt-2023-002415), 2023-12-01

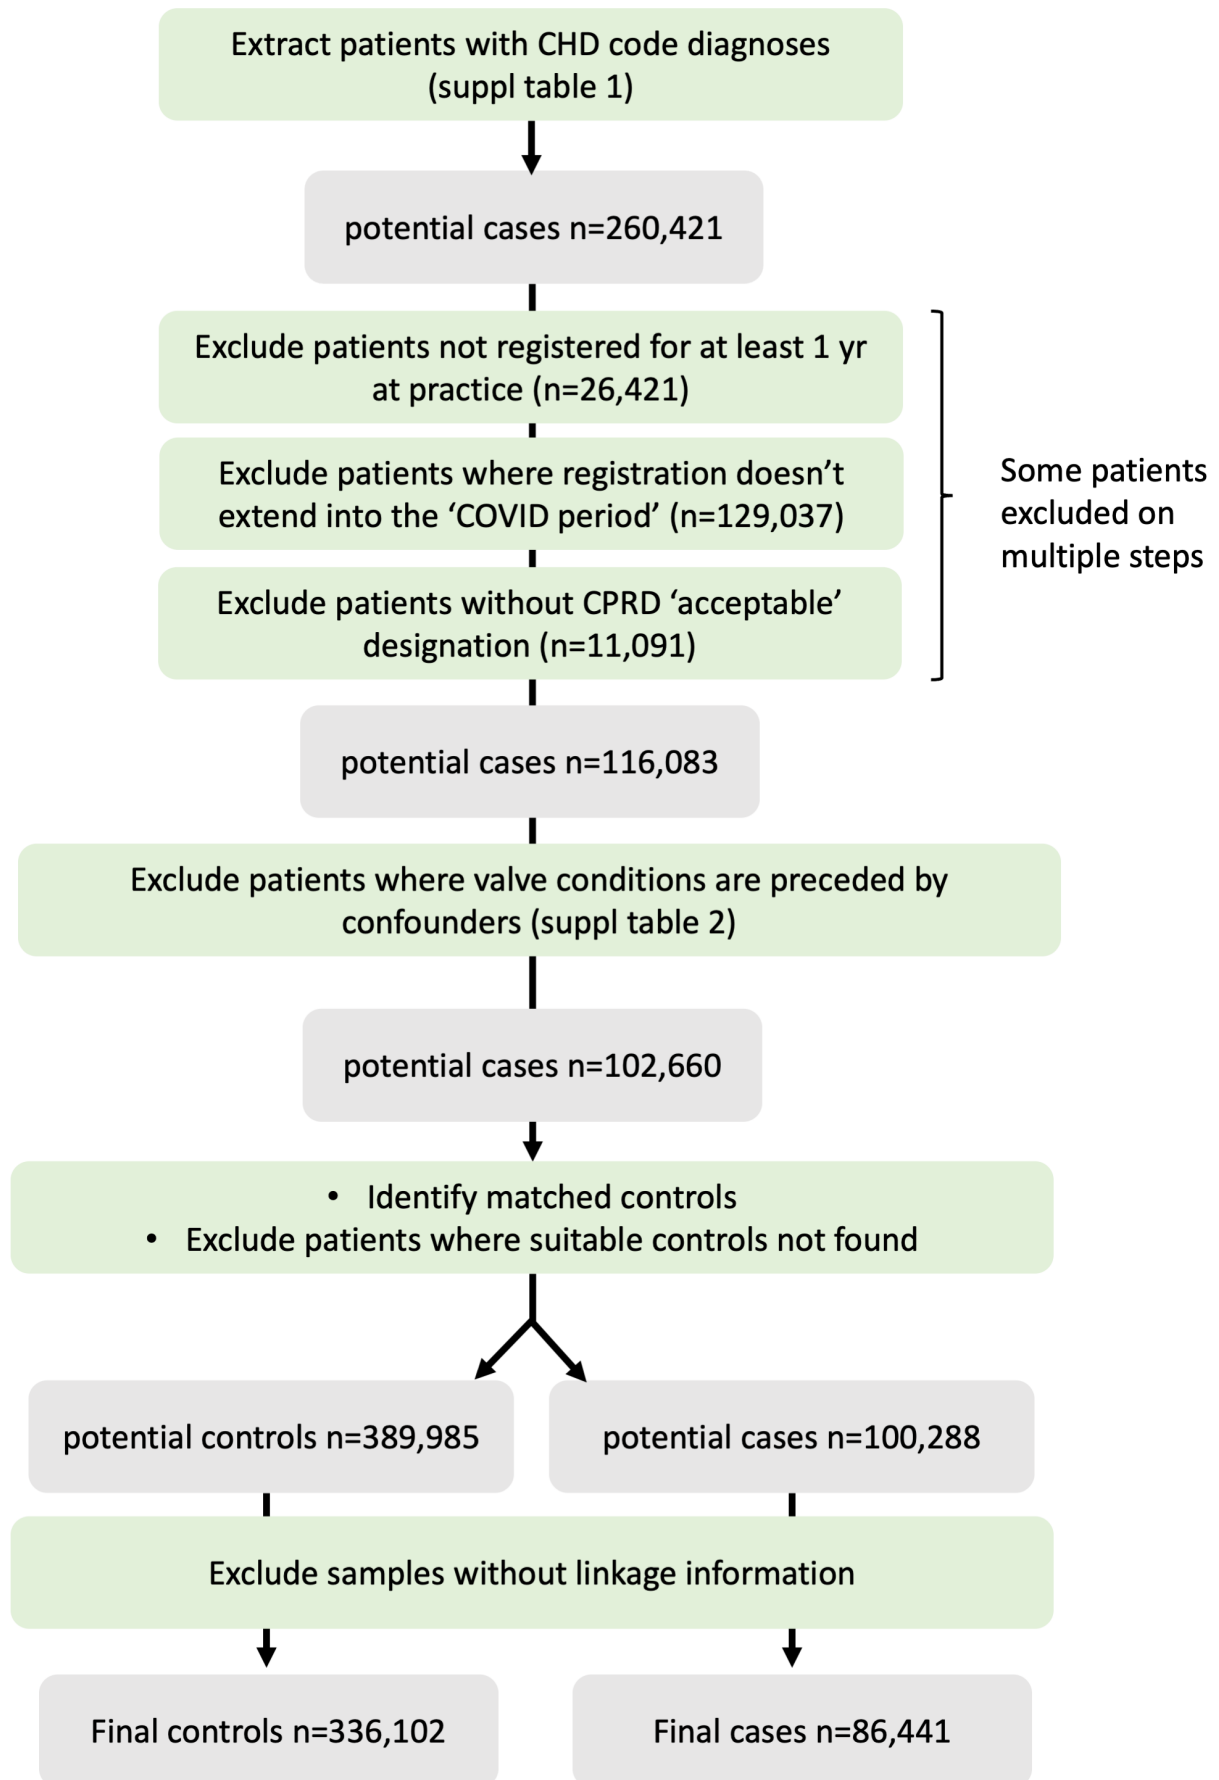

Supplement: openhrt-2023-002415supp001_data_supplement.pdf [file openhrt-2023-002415supp001_data_supplement.pdf]
